# Supplementary material for: Validation of an electronic coding algorithm to identify the primary indication of orthopedic surgeries from administrative data
Source: Springer Nature journal article supplement (doi:10.1186/s12911-020-01175-1), 2020-08-12
Supplement: MOESM1 [file 18274962]

## **Appendix**

Supplemental material for: “Validation of an electronic coding algorithm to identify the primary indication of orthopedic surgeries from administrative data”

### *Descriptions of ICD-10 Codes Used in the Automated Algorithm*

| Code   | Description                                                            |
|--------|------------------------------------------------------------------------|
| C41.2  | Malignant neoplasm of vertebral column                                 |
| C41.4  | Malignant neoplasm of pelvic bones, sacrum and coccyx                  |
| C41.9  | Malignant neoplasm of bone and articular cartilage, unspecified        |
| C79.51 | Secondary malignant neoplasm of bone                                   |
| G83.4  | Cauda equina syndrome                                                  |
| M16.0  | Bilateral primary osteoarthritis of hip                                |
| M16.10 | Unilateral primary osteoarthritis, unspecified hip                     |
| M16.11 | Unilateral primary osteoarthritis, right hip                           |
| M16.12 | Unilateral primary osteoarthritis, left hip                            |
| M16.2  | Bilateral osteoarthritis resulting from hip dysplasia                  |
| M16.30 | Unilateral osteoarthritis resulting from hip dysplasia unspecified hip |
| M16.31 | Unilateral osteoarthritis resulting from hip dysplasia right hip       |
| M16.32 | Unilateral osteoarthritis resulting from hip dysplasia left hip        |
| M16.4  | Bilateral post-traumatic osteoarthritis of hip                         |
| M16.50 | Unilateral post-traumatic osteoarthritis, unspecified hip              |
| M16.51 | Unilateral post-traumatic osteoarthritis, right hip                    |
| M16.52 | Unilateral post-traumatic osteoarthritis, left hip                     |
| M16.6  | Other bilateral secondary osteoarthritis of hip                        |
| M16.7  | Other unilateral secondary osteoarthritis of hip                       |
| M16.9  | Osteoarthritis of hip, unspecified                                     |
| M17.0  | Bilateral primary osteoarthritis of knee                               |
| M17.10 | Unilateral primary osteoarthritis, unspecified knee                    |
| M17.11 | Unilateral primary osteoarthritis, right knee                          |
| M17.12 | Unilateral primary osteoarthritis, left knee                           |
| M17.2  | Bilateral post-traumatic osteoarthritis of knee                        |
| M17.30 | Unilateral post-traumatic osteoarthritis, unspecified knee             |
| M17.31 | Unilateral post-traumatic osteoarthritis, right knee                   |
| M17.32 | Unilateral post-traumatic osteoarthritis, left knee                    |
| M17.4  | Other bilateral secondary osteoarthritis of knee                       |
| M17.5  | Other unilateral secondary osteoarthritis of knee                      |
| M17.9  | Osteoarthritis of knee, unspecified                                    |
| M47.16 | Other spondylosis with myelopathy lumbar region                        |
| M47.26 | Other spondylosis with radiculopathy, lumbar region                    |
| M47.27 | Other spondylosis with radiculopathy, lumbosacral region               |
| M48.00 | Spinal stenosis, site unspecified                                      |

| Code     | Description                                                          |
|----------|----------------------------------------------------------------------|
| M48.061  | Spinal stenosis, lumbar region without neurogenic claudication       |
| M48.062  | Spinal stenosis, lumbar region with neurogenic claudication          |
| M48.07   | Spinal stenosis, lumbar region lumbosacral region                    |
| M48.08   | Spinal stenosis, lumbar region sacral and sacrococcygeal region      |
| M48.46*  | Fatigue fracture of vertebra, lumbar region                          |
| M48.56*  | Collapsed vertebra, not elsewhere classified, lumbar region          |
| M48.57*  | Collapsed vertebra, not elsewhere classified, lumbosacral region     |
| M51.06   | Intervertebral disc disorders with myelopathy, lumbar region         |
| M51.16   | Intervertebral disc disorders with radiculopathy, lumbar region      |
| M51.17   | Intervertebral disc disorders with radiculopathy, lumbosacral region |
| M51.26   | Other intervertebral disc displacement, lumbar region                |
| M51.27   | Other intervertebral disc displacement, lumbosacral region           |
| M51.36   | Other intervertebral disc degeneration, lumbar region                |
| M51.37   | Other intervertebral disc degeneration, lumbosacral region           |
| M80*     | Osteoporosis with current pathological fracture                      |
| M84.30*  | Stress fracture, unspecified site                                    |
| M84.359* | Stress fracture, hip, unspecified                                    |
| M84.40*  | Pathological fracture, unspecified site                              |
| M84.459* | Pathological fracture, hip, unspecified                              |
| M84.48*  | Pathological fracture, other site                                    |
| M84.50*  | Pathological fracture in neoplastic disease, unspecified site        |
| M84.559* | Pathological fracture in neoplastic disease, hip, unspecified        |
| M84.58*  | Pathological fracture in neoplastic disease, other specified site    |
| M84.60*  | Pathological fracture in other disease, unspecified site             |
| M87*     | Osteonecrosis                                                        |
| N31*     | Neuromuscular dysfunction of bladder, not elsewhere classified       |
| R15*     | Fecal incontinence                                                   |
| R32      | Unspecified urinary incontinence                                     |
| S22.08*  | Fracture of T11-T12 vertebra                                         |
| S32.0*   | Fracture of lumbar vertebra                                          |
| S32.4*   | Fracture of acetabulum                                               |
| S72.0*   | Fracture of head and neck of femur                                   |
| S72.1*   | Pertrochanteric fracture                                             |
| S72.2*   | Subtrochanteric fracture of femur                                    |

*Descriptions of CPT Codes Used in the Automated Algorithm*

| Code  | Description                                                                                                                                                                                                                                         |
|-------|-----------------------------------------------------------------------------------------------------------------------------------------------------------------------------------------------------------------------------------------------------|
| 22224 | Osteotomy of spine, including discectomy, anterior approach, single vertebral segment; lumbar                                                                                                                                                       |
| 22533 | Arthrodesis, lateral extracavitary technique, including minimal discectomy to prepare interspace (other than for decompression); lumbar                                                                                                             |
| 22558 | Arthrodesis, anterior interbody technique, including minimal discectomy to prepare interspace (other than for decompression); lumbar                                                                                                                |
| 22586 | Arthrodesis, pre-sacral interbody technique, including disc space preparation, discectomy, with posterior instrumentation, with image guidance, includes bone graft when performed, L5-S1 interspace                                                |
| 22612 | Arthrodesis, posterior or posterolateral technique, single level; lumbar (with lateral transverse technique, when performed)                                                                                                                        |
| 22614 | Arthrodesis, posterior or posterolateral technique, single level; each additional vertebral segment                                                                                                                                                 |
| 22630 | Arthrodesis, posterior interbody technique, including laminectomy and/or discectomy to prepare interspace (other than for decompression), single interspace; lumbar                                                                                 |
| 22632 | Arthrodesis, posterior interbody technique, including laminectomy and/or discectomy to prepare interspace (other than for decompression), single interspace; each additional interspace (list separately in addition to code for primary procedure) |
| 22633 | Arthrodesis, combined posterior or posterolateral technique with posterior interbody technique including laminectomy and/or discectomy sufficient to prepare interspace (other than for decompression), single interspace and segment; lumbar       |
| 22800 | Arthrodesis, posterior, for spinal deformity, with or without cast; up to 6 vertebral segments                                                                                                                                                      |
| 22802 | Arthrodesis, posterior, for spinal deformity, with or without cast; 7 to 12 vertebral segments                                                                                                                                                      |
| 22804 | Arthrodesis, posterior, for spinal deformity, with or without cast; 13 or more vertebral segments                                                                                                                                                   |
| 22808 | Arthrodesis, anterior, for spinal deformity, with or without cast; 2 to 3 vertebral segments                                                                                                                                                        |
| 22810 | Arthrodesis, anterior, for spinal deformity, with or without cast; 4 to 7 vertebral segments                                                                                                                                                        |
| 22857 | Total disc arthroplasty (artificial disc), anterior approach, including discectomy to prepare interspace (other than for decompression), single interspace, lumbar                                                                                  |
| 22862 | Revision including replacement of total disc arthroplasty (artificial disc), anterior approach, single interspace; lumbar                                                                                                                           |
| 22867 | Insertion of interlaminar/interspinous process stabilization/distraction device, without fusion, including image guidance when performed, with open decompression, lumbar; single level                                                             |
| 27125 | Hemiarthroplasty, hip, partial (eg, femoral stem prosthesis, bipolar arthroplasty)                                                                                                                                                                  |
| 27130 | Arthroplasty, acetabular and proximal femoral prosthetic replacement (total hip arthroplasty), with or without autograft or allograft                                                                                                               |
| 27132 | Conversion of previous hip surgery to total hip arthroplasty, with or without autograft or allograft                                                                                                                                                |
| 27438 | Arthroplasty, patella; with prosthesis                                                                                                                                                                                                              |
| 27440 | Arthroplasty, knee, tibial plateau                                                                                                                                                                                                                  |
| 27441 | Arthroplasty, knee, tibial plateau; with debridement and partial synovectomy                                                                                                                                                                        |
| 27442 | Arthroplasty, femoral condyles or tibial plateau(s), knee                                                                                                                                                                                           |
| 27443 | Arthroplasty, femoral condyles or tibial plateau(s), knee; with debridement and partial synovectomy                                                                                                                                                 |

| Code  | Description                                                                                                                                                                                                                                                                                                                                                                       |
|-------|-----------------------------------------------------------------------------------------------------------------------------------------------------------------------------------------------------------------------------------------------------------------------------------------------------------------------------------------------------------------------------------|
| 27445 | Arthroplasty, knee, hinge prosthesis (eg, Walldius type)                                                                                                                                                                                                                                                                                                                          |
| 27446 | Arthroplasty, knee, condyle and plateau; medial OR lateral compartment                                                                                                                                                                                                                                                                                                            |
| 27447 | Arthroplasty, knee, condyle and plateau; medial AND lateral compartments with or without patella resurfacing (total knee arthroplasty)                                                                                                                                                                                                                                            |
| 62287 | Decompression procedure, percutaneous, of nucleus pulposus of intervertebral disc, any method utilizing needle based technique to remove disc material under fluoroscopic imaging or other form of indirect visualization, with the use of an endoscope, with discography and/or epidural injection(s) at the treated level(s), when performed, single or multiple levels, lumbar |
| 63005 | Laminectomy with exploration and/or decompression of spinal cord and/or cauda equina, without facetectomy, foraminotomy or discectomy (eg, spinal stenosis), 1 or 2 vertebral segments; lumbar, except for spondylolisthesis                                                                                                                                                      |
| 63011 | Laminectomy with exploration and/or decompression of spinal cord and/or cauda equina, without facetectomy, foraminotomy or discectomy (eg, spinal stenosis), 1 or 2 vertebral segments; sacral                                                                                                                                                                                    |
| 63012 | Laminectomy with removal of abnormal facets and/or pars inter-articularis with decompression of cauda equina and nerve roots for spondylolisthesis, lumbar (Gill type procedure)                                                                                                                                                                                                  |
| 63017 | Laminectomy with exploration and/or decompression of spinal cord and/or cauda equina, without facetectomy, foraminotomy or discectomy (eg, spinal stenosis), more than 2 vertebral segments; lumbar                                                                                                                                                                               |
| 63030 | Laminotomy (hemilaminectomy), with decompression of nerve root(s), including partial facetectomy, foraminotomy and/or excision of herniated intervertebral disc; 1 interspace, lumbar                                                                                                                                                                                             |
| 63035 | Laminotomy (hemilaminectomy), with decompression of nerve root(s), including partial facetectomy, foraminotomy and/or excision of herniated intervertebral disc; each additional interspace, cervical or lumbar (List separately in addition to code for primary procedure)                                                                                                       |
| 63042 | Laminotomy (hemilaminectomy), with decompression of nerve root(s), including partial facetectomy, foraminotomy and/or excision of herniated intervertebral disc, reexploration, single interspace; lumbar                                                                                                                                                                         |
| 63047 | Laminectomy, facetectomy and foraminotomy (unilateral or bilateral with decompression of spinal cord, cauda equina and/or nerve root(s), (eg, spinal or lateral recess stenosis)), single vertebral segment; lumbar                                                                                                                                                               |
| 63048 | Laminectomy, facetectomy and foraminotomy (unilateral or bilateral with decompression of spinal cord, cauda equina and/or nerve root(s), (eg, spinal or lateral recess stenosis)), single vertebral segment; each additional segment, cervical, thoracic, or lumbar (List separately in addition to code for primary procedure)                                                   |
| 63056 | Transpedicular approach with decompression of spinal cord, equina and/or nerve root(s) (eg, herniated intervertebral disk), single segment; lumbar (including transfacet, or lateral extraforaminal approach) (eg, far lateral herniated intervertebral disk)                                                                                                                     |
| 63087 | Vertebral corpectomy (vertebral body resection), partial or complete, combined thoracolumbar approach with decompression of spinal cord, cauda equina or nerve root(s), lower thoracic or lumbar; single segment                                                                                                                                                                  |
| 63088 | Vertebral corpectomy (vertebral body resection), partial or complete, combined thoracolumbar approach with decompression of spinal cord, cauda equina or nerve root(s), lower thoracic or lumbar; each additional segment (List separately in addition to code for primary procedure)                                                                                             |

| Code  | Description                                                                                                                                                                                                                                                                                                        |
|-------|--------------------------------------------------------------------------------------------------------------------------------------------------------------------------------------------------------------------------------------------------------------------------------------------------------------------|
| 63090 | Vertebral corpectomy (vertebral body resection), partial or complete, transperitoneal or retroperitoneal approach with decompression of spinal cord, cauda equina or nerve root(s), lower thoracic, lumbar, or sacral; single segment                                                                              |
| 63091 | Vertebral corpectomy (vertebral body resection), partial or complete, transperitoneal or retroperitoneal approach with decompression of spinal cord, cauda equina or nerve root(s), lower thoracic, lumbar, or sacral; each additional segment (List separately in addition to code for primary procedure)         |
| 63102 | Vertebral corpectomy (vertebral body resection), partial or complete, lateral extracavitary approach with decompression of spinal cord and/or nerve root(s) (eg, for tumor or retropulsed bone fragments); lumbar, single segment                                                                                  |
| 63103 | Vertebral corpectomy (vertebral body resection), partial or complete, lateral extracavitary approach with decompression of spinal cord and/or nerve root(s) (eg, for tumor or retropulsed bone fragments); thoracic or lumbar, each additional segment (List separately in addition to code for primary procedure) |
| 63170 | Laminectomy with myelotomy (eg, Bischof or DREZ type), cervical, thoracic, or thoracolumbar                                                                                                                                                                                                                        |

*CPT Copyright 2017 American Medical Association. All rights reserved. CPT® is a registered trademark of the American Medical Association.*

*Two-by-Two Tables for Identification of Condition as an Indication for Surgery by the Algorithm*

Hip Arthroplasty with Hip OA Indication

|                         |                                | Gold Standard Determination |                                |       |
|-------------------------|--------------------------------|-----------------------------|--------------------------------|-------|
|                         |                                | Hip Arthroplasty w/ Hip OA  | Not Hip Arthroplasty w/ Hip OA | Total |
| Algorithm Determination | Hip Arthroplasty w/ Hip OA     | 133                         | 38                             | 171   |
|                         | Not Hip Arthroplasty w/ Hip OA | 1                           | 258                            | 259   |
| Total                   |                                | 134                         | 296                            | 430   |

Knee Arthroplasty with Knee OA Indication

|                         |                                  | Gold Standard Determination  |                                  |       |
|-------------------------|----------------------------------|------------------------------|----------------------------------|-------|
|                         |                                  | Knee Arthroplasty w/ Knee OA | Not Knee Arthroplasty w/ Knee OA | Total |
| Algorithm Determination | Knee Arthroplasty w/ Knee OA     | 114                          | 49                               | 163   |
|                         | Not Knee Arthroplasty w/ Knee OA | 4                            | 263                              | 267   |
| Total                   |                                  | 118                          | 312                              | 430   |

Lumbar Spinal Surgery with SpS Indication

|                         |                                  | Gold Standard Determination  |                                  |       |
|-------------------------|----------------------------------|------------------------------|----------------------------------|-------|
|                         |                                  | Lumbar Spinal Surgery w/ SpS | Not Lumbar Spinal Surgery w/ SpS | Total |
| Algorithm Determination | Lumbar Spinal Surgery w/ SpS     | 119                          | 48                               | 167   |
|                         | Not Lumbar Spinal Surgery w/ SpS | 12                           | 226                              | 238   |
| Total                   |                                  | 131                          | 274                              | 405   |

Lumbar Spinal Surgery with HD Indication

|                         |                                 | Gold Standard Determination |                                 |       |
|-------------------------|---------------------------------|-----------------------------|---------------------------------|-------|
|                         |                                 | Lumbar Spinal Surgery w/ HD | Not Lumbar Spinal Surgery w/ HD | Total |
| Algorithm Determination | Lumbar Spinal Surgery w/ HD     | 52                          | 91                              | 143   |
|                         | Not Lumbar Spinal Surgery w/ HD | 2                           | 260                             | 262   |
| Total                   |                                 | 54                          | 351                             | 405   |

*Two-by-Two Tables for Identification of Condition as the Primary Indication for Surgery by the Algorithm*

Hip Arthroplasty with Hip OA Primary Indication

|                         |                                | Gold Standard Determination |                                |       |
|-------------------------|--------------------------------|-----------------------------|--------------------------------|-------|
|                         |                                | Hip Arthroplasty w/ Hip OA  | Not Hip Arthroplasty w/ Hip OA | Total |
| Algorithm Determination | Hip Arthroplasty w/ Hip OA     | 107                         | 2                              | 109   |
|                         | Not Hip Arthroplasty w/ Hip OA | 21                          | 300                            | 321   |
| Total                   |                                | 128                         | 302                            | 430   |

Knee Arthroplasty with Knee OA Primary Indication

|                         |                                  | Gold Standard Determination  |                                  |       |
|-------------------------|----------------------------------|------------------------------|----------------------------------|-------|
|                         |                                  | Knee Arthroplasty w/ Knee OA | Not Knee Arthroplasty w/ Knee OA | Total |
| Algorithm Determination | Knee Arthroplasty w/ Knee OA     | 105                          | 2                                | 107   |
|                         | Not Knee Arthroplasty w/ Knee OA | 9                            | 314                              | 323   |
| Total                   |                                  | 114                          | 316                              | 430   |

Lumbar Spinal Surgery with SpS Primary Indication

|                         |                                  | Gold Standard Determination  |                                  |       |
|-------------------------|----------------------------------|------------------------------|----------------------------------|-------|
|                         |                                  | Lumbar Spinal Surgery w/ SpS | Not Lumbar Spinal Surgery w/ SpS | Total |
| Algorithm Determination | Lumbar Spinal Surgery w/ SpS     | 97                           | 16                               | 113   |
|                         | Not Lumbar Spinal Surgery w/ SpS | 30                           | 262                              | 292   |
| Total                   |                                  | 127                          | 278                              | 405   |

Lumbar Spinal Surgery with HD Primary Indication

|                         |                                 | Gold Standard Determination |                                 |       |
|-------------------------|---------------------------------|-----------------------------|---------------------------------|-------|
|                         |                                 | Lumbar Spinal Surgery w/ HD | Not Lumbar Spinal Surgery w/ HD | Total |
| Algorithm Determination | Lumbar Spinal Surgery w/ HD     | 37                          | 13                              | 50    |
|                         | Not Lumbar Spinal Surgery w/ HD | 16                          | 339                             | 355   |
| Total                   |                                 | 53                          | 352                             | 405   |
